# Supplementary material for: Oral Mucositis Management in Children under Cancer Treatment: A Systematic Review
Source: MDPI journal article supplement (doi:10.3390/cancers16081548), 2024-04-18
Supplement: s1 [file s1]

## SUPPLEMENTARY MATERIAL

**Supplementary Table S1.** Literature search with the corresponding search terms in each database.

|                     |                                                                                                                                                                                                                                                                                                                                                                                                                                                                                                                                                                                                                                                                                                                                                                                                                                                                                                                                                                                                                                                                                                                                                                                                                                                                                                                                                                                                                                                                                                                                                                                                                                                                                                                                                                                                                                                                                                                                                                                                                                                                                                                                                                                                                                                                                                                                                                                                                                                                                                                                                                                                                                                                                                                                                                                                                                                                                                                                                                                                                                                                                                                                                                                                                                                                                                                                                                                                                                                                              |
|---------------------|------------------------------------------------------------------------------------------------------------------------------------------------------------------------------------------------------------------------------------------------------------------------------------------------------------------------------------------------------------------------------------------------------------------------------------------------------------------------------------------------------------------------------------------------------------------------------------------------------------------------------------------------------------------------------------------------------------------------------------------------------------------------------------------------------------------------------------------------------------------------------------------------------------------------------------------------------------------------------------------------------------------------------------------------------------------------------------------------------------------------------------------------------------------------------------------------------------------------------------------------------------------------------------------------------------------------------------------------------------------------------------------------------------------------------------------------------------------------------------------------------------------------------------------------------------------------------------------------------------------------------------------------------------------------------------------------------------------------------------------------------------------------------------------------------------------------------------------------------------------------------------------------------------------------------------------------------------------------------------------------------------------------------------------------------------------------------------------------------------------------------------------------------------------------------------------------------------------------------------------------------------------------------------------------------------------------------------------------------------------------------------------------------------------------------------------------------------------------------------------------------------------------------------------------------------------------------------------------------------------------------------------------------------------------------------------------------------------------------------------------------------------------------------------------------------------------------------------------------------------------------------------------------------------------------------------------------------------------------------------------------------------------------------------------------------------------------------------------------------------------------------------------------------------------------------------------------------------------------------------------------------------------------------------------------------------------------------------------------------------------------------------------------------------------------------------------------------------------------|
| PubMed/MEDLINE<br>® | ((((("oral mucositis"[All Fields] OR "oral cavity"[All Fields] OR "oral mucosa"[All Fields] OR "oral complications"[All Fields] OR "oral mucosa injuries"[All Fields] OR "stomatitis"[MeSH Terms]) AND ("child"[MeSH Terms] OR "child"[All Fields] OR "children"[All Fields] OR "child s"[All Fields] OR "children s"[All Fields] OR "childrens"[All Fields] OR "childs"[All Fields] OR "pre schooler"[All Fields] OR "pre schooler"[All Fields] OR ("childhood"[All Fields] OR "childhoods"[All Fields]) OR "pre teen"[All Fields] OR "preteen"[All Fields] OR "teen"[All Fields] OR "teenager"[All Fields] OR ("adolescent"[MeSH Terms] OR "adolescent"[All Fields] OR "youth"[All Fields] OR "youths"[All Fields] OR "youth s"[All Fields]) OR "paediatric patient"[All Fields] OR "adolescen"[All Fields] OR "paediatric population"[All Fields] OR "child"[MeSH Terms] OR "child, preschool"[MeSH Terms] OR ("child, preschool"[MeSH Terms] OR ("child"[All Fields] AND "preschool"[All Fields]) OR "preschool child"[All Fields] OR "preschooler"[All Fields] OR "preschoolers"[All Fields] OR "preschool"[All Fields] OR "preschooler s"[All Fields] OR "preschools"[All Fields]) OR "adolescent"[MeSH Terms]) AND ((((((("chemotherapy s"[All Fields] OR "drug therapy"[MeSH Terms] OR ("drug"[All Fields] AND "therapy"[All Fields]) OR "drug therapy"[All Fields] OR "chemotherapies"[All Fields] OR "drug therapy"[MeSH Subheading] OR "chemotherapy"[All Fields]) AND "cancer treatment"[All Fields]) AND ( ) AND "cancer therap"[All Fields]) AND ( ) AND "drug therap"[All Fields]) OR "radiation therap"[All Fields] OR "oncological therap"[All Fields] OR ("radiate"[All Fields] OR "radiated"[All Fields] OR "radiates"[All Fields] OR "radiating"[All Fields] OR "radiation"[MeSH Terms] OR "radiation"[All Fields] OR "electromagnetic radiation"[MeSH Terms] OR ("electromagnetic"[All Fields] AND "radiation"[All Fields]) OR "electromagnetic radiation"[All Fields] OR "radiations"[All Fields] OR "radiation s"[All Fields] OR "radiator"[All Fields] OR "radiators"[All Fields]) OR "radiation injur"[All Fields] OR "therap"[All Fields] OR "radiotherapy"[MeSH Terms] OR "therapy"[MeSH Subheading] OR "antineoplastic agents"[MeSH Terms] OR ("radiation"[MeSH Terms] OR "electromagnetic radiation"[MeSH Terms] OR "therapeutics"[MeSH Terms]) AND ("cancer s"[All Fields] OR "cancerated"[All Fields] OR "canceration"[All Fields] OR "cancerization"[All Fields] OR "cancerized"[All Fields] OR "cancerous"[All Fields] OR "neoplasms"[MeSH Terms] OR "neoplasms"[All Fields] OR "cancer"[All Fields] OR "cancers"[All Fields] OR ("cysts"[MeSH Terms] OR "cysts"[All Fields] OR "cyst"[All Fields] OR "neurofibroma"[MeSH Terms] OR "neurofibroma"[All Fields] OR "neurofibromas"[All Fields] OR "tumor s"[All Fields] OR "tumoral"[All Fields] OR "tumorous"[All Fields] OR "tumour"[All Fields] OR "neoplasms"[MeSH Terms] OR "neoplasms"[All Fields] OR "tumor"[All Fields] OR "tumour s"[All Fields] OR "tumoural"[All Fields] OR "tumourous"[All Fields] OR "tumours"[All Fields] OR "tumors"[All Fields]) OR "neoplasms"[MeSH Terms])) NOT ("review"[Publication Type] OR "review literature as topic"[MeSH Terms] OR "review"[All Fields])) NOT ("systematic review"[Publication Type] OR "systematic reviews as topic"[MeSH Terms] OR "systematic review"[All Fields])) NOT ("meta analysis"[Publication Type] OR "meta analysis as |
|---------------------|------------------------------------------------------------------------------------------------------------------------------------------------------------------------------------------------------------------------------------------------------------------------------------------------------------------------------------------------------------------------------------------------------------------------------------------------------------------------------------------------------------------------------------------------------------------------------------------------------------------------------------------------------------------------------------------------------------------------------------------------------------------------------------------------------------------------------------------------------------------------------------------------------------------------------------------------------------------------------------------------------------------------------------------------------------------------------------------------------------------------------------------------------------------------------------------------------------------------------------------------------------------------------------------------------------------------------------------------------------------------------------------------------------------------------------------------------------------------------------------------------------------------------------------------------------------------------------------------------------------------------------------------------------------------------------------------------------------------------------------------------------------------------------------------------------------------------------------------------------------------------------------------------------------------------------------------------------------------------------------------------------------------------------------------------------------------------------------------------------------------------------------------------------------------------------------------------------------------------------------------------------------------------------------------------------------------------------------------------------------------------------------------------------------------------------------------------------------------------------------------------------------------------------------------------------------------------------------------------------------------------------------------------------------------------------------------------------------------------------------------------------------------------------------------------------------------------------------------------------------------------------------------------------------------------------------------------------------------------------------------------------------------------------------------------------------------------------------------------------------------------------------------------------------------------------------------------------------------------------------------------------------------------------------------------------------------------------------------------------------------------------------------------------------------------------------------------------------------------|

|                                 |                                                                                                                                                                                                                                                                                                                                                                                                                                                                                                                                                                                                                                                                                                                                                                                                                                                                                                                                                                                                                                                                                                                                                                                                                                                                                                                                                                                                                                                                                                                                                                                                                                                                                                                                                                                                                                                                                                                                      |
|---------------------------------|--------------------------------------------------------------------------------------------------------------------------------------------------------------------------------------------------------------------------------------------------------------------------------------------------------------------------------------------------------------------------------------------------------------------------------------------------------------------------------------------------------------------------------------------------------------------------------------------------------------------------------------------------------------------------------------------------------------------------------------------------------------------------------------------------------------------------------------------------------------------------------------------------------------------------------------------------------------------------------------------------------------------------------------------------------------------------------------------------------------------------------------------------------------------------------------------------------------------------------------------------------------------------------------------------------------------------------------------------------------------------------------------------------------------------------------------------------------------------------------------------------------------------------------------------------------------------------------------------------------------------------------------------------------------------------------------------------------------------------------------------------------------------------------------------------------------------------------------------------------------------------------------------------------------------------------|
|                                 | topic"[MeSH Terms] OR "meta analysis"[All Fields])) NOT ("case reports"[Publication Type] OR "case reports"[All Fields])) AND ((humans[Filter]) AND (english[Filter] OR portuguese[Filter]) AND (2003:2024[pdat]))                                                                                                                                                                                                                                                                                                                                                                                                                                                                                                                                                                                                                                                                                                                                                                                                                                                                                                                                                                                                                                                                                                                                                                                                                                                                                                                                                                                                                                                                                                                                                                                                                                                                                                                   |
| NICE                            | Oral mucositis treatment AND Cancer AND Children                                                                                                                                                                                                                                                                                                                                                                                                                                                                                                                                                                                                                                                                                                                                                                                                                                                                                                                                                                                                                                                                                                                                                                                                                                                                                                                                                                                                                                                                                                                                                                                                                                                                                                                                                                                                                                                                                     |
| ICTRP                           | Oral mucositis treatment AND Cancer AND Children                                                                                                                                                                                                                                                                                                                                                                                                                                                                                                                                                                                                                                                                                                                                                                                                                                                                                                                                                                                                                                                                                                                                                                                                                                                                                                                                                                                                                                                                                                                                                                                                                                                                                                                                                                                                                                                                                     |
| Embase<br>(MEDLINE<br>excluded) | ("oral mucositis of oral cavity" or "oral mucosa" or "oral complications" or "oral mucosa injuries" or stomatitis).mp. [mptitle, abstract, heading word, drug trade name, original title, device manufacturer, drug manufacturer, device trade name, keyword heading word, floating subheading word, candidate term word] and (children or "pre-schooler" or "preschooler or childhood or "pre teen" or "preteen" or teen" or teenager" or youth or "paediatric patient or adolescen" or "paediatric population" or child or "child preschool" or preschool or adolescent).mp.(mp-title,abstract, heading word, drug trade name, original title, device manufacturer, drug manufacturer, device trade name, keyword heading word, floating subheading word, candidate term word] and (Chemotherapy or "cancer treatment" or "cancer therap" or "drug therap" or "radiation therap" or "oncological therap" or radiation or "radiation injur" or "therap" Radiotherapy" or "antineoplastic agents" or Therapeutics).mp.(mp-title, abstract, heading word, drug trade name, original title, device manufacturer, drug manufacturer, device trade name, keyword heading word, floating subheading word, candidate term word] and (cancer or tumour or neoplasms).mp. (mp-title, abstract, heading word, drug trade name, original title, device manufacturer, drug manufactures, device trade name, keyword heading word, floating subheading word, candidate term word] limit to (human and (english or portuguese) and yr="2003 - 2024") and limit to "remove medline records"                                                                                                                                                                                                                                                                                                                                                        |
| Scopus                          | ( TITLE-ABS-KEY ( ( {oral mucositis} OR {oral cavity} OR {oral mucosa} OR {oral complications} OR {oral mucosa injuries} OR {stomatitis} ) ) AND TITLE-ABS-KEY ( ( {chemotherapy s} OR {drug} OR {therapy} OR {chemotherapies} OR {drug therapy} OR {chemotherapy} OR {cancer treatment} OR {radiation therap*} OR {oncological therap*} OR {radiate} OR {radiated} OR {radiates} OR {radiating} OR {radiation} OR {radiation} OR {electromagnetic radiation} OR {electromagnetic} OR {electromagnetic radiation} OR {radiations} OR {radiation s} OR {radiator} OR {radiators} OR {radiation injur*} OR {therap*} OR {radiotherapy} OR {therapy} OR {antineoplastic agents} OR {radiation} OR {electromagnetic radiation} OR {therapeutics} ) ) AND TITLE-ABS-KEY ( ( {child} OR {children} OR {child s} OR {children s} OR {childrens} OR {childs} OR {pre schooler*} OR {pre schooler*} OR {childhood} OR {childhoods} OR {pre teen*} OR {preteen*} OR {teen*} OR {teenager} OR {adolescent} OR {adolescent} OR {youth} OR {youths} OR {youth s} OR {paediatric patient*} OR {adolescen*} OR {paediatric population} OR {child} OR {child, preschool} ] OR {child, preschool} OR {child} OR {preschool} ) OR {preschool child} OR {preschooler} OR {preschoolers} OR {preschool} OR {preschooler s} OR {preschools} OR {adolescent} ) AND TITLE-ABS-KEY ( ( {cancer s} OR {cancerated} OR {canceration} OR {cancerization} OR {cancerized} OR {cancerous} OR {neoplasms} OR {neoplasms} OR {cancer} OR {cancers} OR {cysts} OR {cysts} OR {cyst} OR {neurofibroma} OR {neurofibroma} OR {neurofibromas} OR {tumor s} OR {tumoral} OR {tumorous} OR {tumour} OR {neoplasms} OR {neoplasms} OR {tumor} OR {tumour s} OR {tumoural} OR {tumourous} OR {tumours} OR {tumors} OR {neoplasms} ) ) AND NOT TITLE-ABS-KEY ( ( {review} OR {systematic review} OR {meta analysis} OR {case report} ) ) ) AND PUBYEAR > 2002 AND ( LIMIT-TO |

|                |                                                                                                                                                                                                                                                                                                                                                                                                                                                                                                                                                                                                                                            |
|----------------|--------------------------------------------------------------------------------------------------------------------------------------------------------------------------------------------------------------------------------------------------------------------------------------------------------------------------------------------------------------------------------------------------------------------------------------------------------------------------------------------------------------------------------------------------------------------------------------------------------------------------------------------|
|                | ( EXACTKEYWORD , "Human" ) ) AND ( LIMIT-TO ( LANGUAGE , "English" ) OR LIMIT-TO ( LANGUAGE , "Portuguese" ) )                                                                                                                                                                                                                                                                                                                                                                                                                                                                                                                             |
| Web of Science | ("oral mucositis" OR "oral cavity" OR "oral mucosa" OR "oral complications" OR "oral mucosa injuries" OR stomatitis) AND (children OR "pre-schooler*" OR "pre schooler*" OR childhood OR "pre teen*" OR "preteen*" OR teen* OR teenager* OR youth OR "paediatric patient*" OR adolescen* OR "paediatric population" OR child OR "child preschool" OR preschool) AND (Chemotherapy OR "cancer treatment" OR "cancer therap*" OR "drug therap*" OR "radiation therap*" OR "oncological therap*" OR radiation OR "radiation injur*" OR "therap* Radiotherapy" OR "antineoplastic agents" OR Therapeutics) AND (cancer OR tumour OR neoplasms) |

**Supplementary Table S2.** Inclusion and exclusion criteria.

|           |                                                                                                               |
|-----------|---------------------------------------------------------------------------------------------------------------|
| Inclusion | Pediatric patients ( $\leq 18$ years of age)                                                                  |
|           | Completed or undergoing oncologic treatment                                                                   |
|           | Presenting outcomes for an oral mucositis therapeutic intervention                                            |
| Exclusion | Systematic reviews and meta-analysis, narrative reviews, case reports, opinion articles, conference abstracts |
|           | Studies in animal models or <i>in vitro</i>                                                                   |
|           | Reports of children that did not receive cancer treatment                                                     |
|           | Reports of children that did not develop oral mucositis                                                       |
|           | No defined age range or patients $\geq 19$ years of age                                                       |
|           | No control group (without intervention or standard oral care)                                                 |

**Supplementary Table S3.** Quality assessment analysis using the Modified Newcastle-Ottawa Scale.

| Author and publication year       | Selection (****) | Comparability (**) | Exposure (***) | Total score<br>Risk: $\leq 5$ = high; 6-7 = moderate; $\geq 8$ = low |
|-----------------------------------|------------------|--------------------|----------------|----------------------------------------------------------------------|
| Abdulrhman M <i>et al.</i> , 2012 | ****             | **                 | ***            | 9                                                                    |

|                                         |      |    |     |   |
|-----------------------------------------|------|----|-----|---|
| Alkhouli M <i>et al.</i> , 2021         | **** | *  | *** | 8 |
| Alkhouli M <i>et al.</i> , 2019         | **** | *  | *** | 8 |
| Amadori F <i>et al.</i> , 2016          | **** | *  | **  | 7 |
| Badr LK <i>et al.</i> , 2023            | **** | ** | **  | 8 |
| Bardellini E <i>et al.</i> , 2016       | ***  | *  | *** | 7 |
| Bostanabad MA <i>et al.</i> , 2018      | ***  | *  | *** | 7 |
| Chang YH <i>et al.</i> , 2017           | **   | *  | **  | 5 |
| Costa EM <i>et al.</i> , 2003           | **   | *  | *   | 4 |
| Cruz LB <i>et al.</i> , 2007            | ***  | ** | **  | 7 |
| de Castro JFL <i>et al.</i> , 2013      | ***  | *  | *   | 5 |
| de Koning BA <i>et al.</i> , 2007       | ***  | ** | *** | 8 |
| Funato M <i>et al.</i> , 2018           | *    | *  | **  | 4 |
| Gandemer V <i>et al.</i> , 2007         | **** | *  | **  | 7 |
| Gobbo M <i>et al.</i> , 2018            | **** | *  | *** | 8 |
| Gutiérrez-Vargas R <i>et al.</i> , 2020 | ***  | *  | *** | 7 |
| Immonen E <i>et al.</i> , 2020          | ***  | *  | **  | 6 |
| Kamsvåg T <i>et al.</i> , 2020          | *    | *  | **  | 4 |
| Khurana H <i>et al.</i> , 2013          | ***  | ** | **  | 7 |
| Kobyá HB <i>et al.</i> , 2016           | ***  | ** | **  | 7 |
| Lauritano D <i>et al.</i> , 2014        | *    | ** | **  | 5 |
| Lucchese A <i>et al.</i> , 2016         | **** | *  | *** | 8 |
| Medeiros-Filho JB <i>et al.</i> , 2017  | ***  | ** | *** | 8 |
| Morris J <i>et al.</i> , 2016           | **   | *  | **  | 5 |
| Mubaraki S <i>et al.</i> , 2020         | **** | ** | **  | 8 |
| Nunes LFM <i>et al.</i> , 2020          | **   | ** | *** | 7 |
| Pinto LP <i>et al.</i> , 2006           | **   | *  | *   | 4 |
| Prakash S <i>et al.</i> , 2020          | **** | *  | *** | 8 |

|                                 |      |    |     |   |
|---------------------------------|------|----|-----|---|
| Raphael MF <i>et al.</i> , 2014 | ***  | *  | *** | 7 |
| Rathe M <i>et al.</i> , 2020    | **** | *  | *** | 8 |
| Reyad F <i>et al.</i> , 2022    | **** | *  | *** | 8 |
| Sato A <i>et al.</i> , 2006     | **   | ** | *** | 7 |
| Shah D <i>et al.</i> , 2023     | **** | *  | *** | 8 |
| Shahrabi M <i>et al.</i> , 2022 | ***  | *  | *** | 7 |
| Soares ADS <i>et al.</i> , 2021 | ***  | *  | *** | 7 |
| Soto M <i>et al.</i> , 2015     | **   | *  | *   | 4 |
| Sung L <i>et al.</i> , 2007     | ***  | *  | **  | 6 |
| Vitale M <i>et al.</i> , 2017   | **** | *  | **  | 7 |
| Widjaja NA <i>et al.</i> , 2020 | ***  | ** | *** | 8 |

**Supplementary Table S4.** Additional characteristics of the included studies.

| Author and publication year        | Oral mucositis grade (WHO scale) | Oral mucositis treatment dose                                                        | Most common malignant disease | Antineoplastic intervention details                                   |
|------------------------------------|----------------------------------|--------------------------------------------------------------------------------------|-------------------------------|-----------------------------------------------------------------------|
| Abdulrhman M <i>et al.</i> , 2012  | 2 - 3                            | 0.5 g/kg (maximum 15 g) 3 times daily<br>or<br>0.25 g/kg (maximum 5 g) 3 times daily | ALL                           | Methotrexate (2 g/m <sup>2</sup> )                                    |
| Alkhouli M <i>et al.</i> , 2021    | 0                                | 70% solution 2 times daily                                                           | ALL                           | (n.a.)                                                                |
| Alkhouli M <i>et al.</i> , 2019    | 0                                | 5 ml                                                                                 | ALL                           | Methotrexate                                                          |
| Amadori F <i>et al.</i> , 2016     | 2 - 4                            | 830 nm, 150 mW, 1 cm <sup>2</sup> , 30 s per cm <sup>2</sup> , 4.5 J/cm <sup>2</sup> | (n.a.)                        | (n.a.)                                                                |
| Badr LK <i>et al.</i> , 2023       | 1 - 4                            | 2.5 cc                                                                               | ALL                           | Doxorubicin or Methotrexate                                           |
| Bardellini E <i>et al.</i> , 2016  | 1 - 2                            | 15 mL 3 times daily                                                                  | ALL                           | (n.a.)                                                                |
| Bostanabad MA <i>et al.</i> , 2018 | 1 - 2                            | (n.a.)                                                                               | ALL and AML                   | Cisplatin, Cyclophosphamide, Methotrexate, Adriamycin, or Vincristine |
| Chang YH <i>et al.</i> , 2017      | 1 - 2                            | 0.4 g/kg/day                                                                         | ALL                           | Methotrexate (2.5 g/m <sup>2</sup> or 5 g/m <sup>2</sup> )            |
| Costa EM <i>et al.</i> , 2003      | (n.a.)                           | (n.a.)                                                                               | ALL                           | 6-mercaptopurine (50 mg/m <sup>2</sup> /day) AND                      |

|                                         |        |                                                                                           |               |                                                                                                                   |
|-----------------------------------------|--------|-------------------------------------------------------------------------------------------|---------------|-------------------------------------------------------------------------------------------------------------------|
|                                         |        |                                                                                           |               | Methotrexate (2 mg/m <sup>2</sup> )                                                                               |
| de Castro JFL <i>et al.</i> , 2013      | (n.a.) | 660 or 830 nm, 100 mW, 3.57 W/cm <sup>2</sup> , 0.028 cm <sup>2</sup> , 1 J               | ALL           | Methotrexate (2.5 g/m <sup>2</sup> or 5 g/m <sup>2</sup> )                                                        |
| de Koning BA <i>et al.</i> , 2007       | 3 - 4  | 62 µg TGF- β2/day (<20 kg) or 124 µg TGF- β2/day (20-40 kg) or 186 µg TGF- β2/day (>40kg) | ALL, AML, NHL | Vincristine, Cyclofosfamide, Doxorubicine, High dose-Methotrexate                                                 |
| Funato M <i>et al.</i> , 2018           | 0      | 5 ml 4 times daily                                                                        | Neuroblastoma | Carboplatin, Melphalan, and Etoposide                                                                             |
| Gandemer V <i>et al.</i> , 2007         | 3 - 4  | 5 or 6 pieces per day                                                                     | Lymphoma      | Cyclophosphamide- Vincristine- Prednisone- Methotrexate (3 g/m <sup>2</sup> and 8 g/m <sup>2</sup> )- Doxorubicin |
| Gobbo M <i>et al.</i> , 2018            | 3 - 4  | 660 and 970 nm, 3.2 W, 320mW/cm <sup>2</sup> , 36.8J/cm <sup>2</sup>                      | ALL           | (n.a.)                                                                                                            |
| Gutiérrez-Vargas R <i>et al.</i> , 2020 | 0      | 50 mg/day                                                                                 | ALL and AML   | (n.a.)                                                                                                            |
| Immonen E <i>et al.</i> , 2020          | 0      | (n.a.)                                                                                    | ALL           | Methotrexate (≥1 g/m <sup>2</sup> )                                                                               |
| Kamsvåg T <i>et al.</i> , 2020          | 0      | ≥ 30 min in 74 sessions                                                                   | ALL           | Busulfan                                                                                                          |
| Khurana H <i>et al.</i> , 2013          | 0 - 4  | 200 mg/day                                                                                | ALL, AML, NHL | Mitoxantrone, Chlorambucil, and Prednisolone                                                                      |
| Koby HB <i>et al.</i> , 2016            | 1 - 4  | 1 g/kg/day                                                                                | ALL           | St Jude Total XV protocol                                                                                         |
| Lauritano D <i>et al.</i> , 2014        | 1 - 4  | 60 mg/kg/day                                                                              | ALL           | 12 Gy over eight sittings of 150 cGy twice a day for 4 days                                                       |
| Lucchese A <i>et al.</i> , 2016         | (n.a.) | 60 µg/kg                                                                                  | ALL           | (n.a.)                                                                                                            |
| Medeiros-Filho JB <i>et al.</i> , 2017  | (n.a.) | Photosensitizer for 5 min and 660 nm, 100 mW, 1 cm above the lesion, and 90 s             | (n.a.)        | (n.a.)                                                                                                            |
| Morris J <i>et al.</i> , 2016           | (n.a.) | 60 µg/kg/day or 80 µg/kg/day                                                              | ALL           | 1200 cGy, Etoposide (1500 mg/m <sup>2</sup> ), Cyclophosphamide (120 mg/kg)                                       |
| Mubarak S <i>et al.</i> , 2020          | (n.a.) | 4 times daily                                                                             | ALL and AML   | Fludarabine, Busulphan, Cyclophosphamide, Methotrexate, Cyclosporine, or Antithymocyte globulin                   |
| Nunes LFM <i>et al.</i> , 2020          | 0      | 660 nm, 100 mW, 2 J, 3.33 W/cm <sup>2</sup> , and 20 s                                    | ALL           | Methotrexate                                                                                                      |

|                                 |        |                                               |                 |                                                                                                                                                                   |
|---------------------------------|--------|-----------------------------------------------|-----------------|-------------------------------------------------------------------------------------------------------------------------------------------------------------------|
| Pinto LP <i>et al.</i> , 2006   | 0      | Cotton pad immersed in the solution for 1 min | ALL             | Methotrexate                                                                                                                                                      |
| Prakash S <i>et al.</i> , 2020  | 3 - 4  | 1 mg/kg (maximum 40 mg)                       | ALL             | (n.a.)                                                                                                                                                            |
| Raphael MF <i>et al.</i> , 2014 | 0 - 4  | 4 times daily                                 | ALL             | (n.a.)                                                                                                                                                            |
| Rathe M <i>et al.</i> , 2020    | 0      | 0.5-1 g/kg/day                                | ALL             | Nordic Society of Paediatric Haematology and Oncology ALL 2008 protocol                                                                                           |
| Reyad F <i>et al.</i> , 2022    | 1 - 4  | 980 nm, 1.5 W, 30 s, 4.5 J/cm <sup>2</sup>    | ALL             | (n.a.)                                                                                                                                                            |
| Sato A <i>et al.</i> , 2006     | 0      | 1.5 mg/kg/day                                 | Solid tumors    | Etoposide (200 mg/m <sup>2</sup> ), Carboplatin (400 mg/m <sup>2</sup> ), Melphalan (60 mg/m <sup>2</sup> ) and Pirarubicin hydrochloride (40 mg/m <sup>2</sup> ) |
| Shah D <i>et al.</i> , 2023     | 0      | 1 mg/kg/day                                   | ALL             | (n.a.)                                                                                                                                                            |
| Shahrabi M <i>et al.</i> , 2022 | 0      | Spray every 6 hours                           | ALL             | Cyclophosphamide (60 mg/kg/day)                                                                                                                                   |
| Soares ADS <i>et al.</i> , 2021 | (n.a.) | Application every 6 hours                     | ALL             | (n.a.)                                                                                                                                                            |
| Soto M <i>et al.</i> , 2015     | 0 - 4  | 830 nm, 80 mW, 30 sec, 2.4 J                  | ALL and AML     | Busulfan and Melphalan                                                                                                                                            |
| Sung L <i>et al.</i> , 2007     | 0      | 2 mL/day                                      | Ewing's sarcoma | Doxorubicin (60 mg/m <sup>2</sup> )                                                                                                                               |
| Vitale M <i>et al.</i> , 2017   | 4      | 970 nm, 3.2 W, 230 s                          | (n.a.)          | (n.a.)                                                                                                                                                            |
| Widjaja NA <i>et al.</i> , 2020 |        | 400 mg/kg/day                                 | ALL             | 2013 Indonesian ALL Chemotherapy Protocol                                                                                                                         |

n.a., not available; ALL, Acute Lymphoblastic Leukaemia; AML, Acute Myeloid Leukemia; NHL, non-Hodgkin Lymphoma.
